# Supplementary material for: Genomic Signatures of Selection Associated With Litter Size Trait in Jining Gray Goat
Source: Front Genet. 2020 Mar 26;11:286. doi: 10.3389/fgene.2020.00286 (PMC7113370; doi:10.3389/fgene.2020.00286)
Supplement: TABLE S1 — Statistics of reads depth and overage of each sample. [file Table_1.XLSX]

## Sheet: Sheet1
Sample	Population	Average depth(X)	Coverage at least 1X(%)	Coverage at least 4X(%)
H-1	LS3	8.64974	94.7	89.64
H-2	LS3	10.1964	94.8	91.23
H-3	LS3	8.7106	94.64	89.55
H-4	LS3	12.2279	94.95	92.68
H-5	LS3	11.2028	95.01	92.25
H-6	LS3	11.8927	94.98	92.59
H-8	LS2	10.701	94.86	91.89
H-9	LS2	11.9625	94.91	92.57
H-14	LS2	11.0267	94.92	92.09
H-15	LS2	12.6215	95.07	92.93
H-16	LS2	10.7234	94.92	91.9
H-17	LS2	11.9336	94.97	92.56
H-19	LS2	13.2294	95.03	93.08
H-20	LS2	11.4224	94.96	92.39
H-21B	LS2	11.0204	94.9	91.98
H-22B	LS2	10.9836	94.95	92.15
H-23B	LS2	10.5618	94.82	91.85
H-24B	LS2	11.1555	94.96	92.23
H-25B	LS2	11.1411	94.86	92.16
H-26B	LS2	10.517	94.78	91.61
L-1	LS1	8.57519	94.66	89.3
L-2	LS1	8.73399	94.72	89.64
L-3	LS1	8.62625	94.72	89.31
L-4	LS1	8.97939	94.68	90.02
L-5	LS1	8.70542	94.67	89.43
L-6	LS1	11.2528	94.99	92.21
L-7	LS1	8.76208	94.66	89.54
L-8	LS1	9.07157	94.71	90.15
L-9	LS1	8.50749	94.74	89.02
L-10	LS1	8.8822	94.72	89.88
L-11	LS1	8.81945	94.77	89.7
L-12	LS1	8.49401	94.63	89.03
L-13	LS1	8.56301	94.62	89.34
L-15	LS1	8.6249	94.51	89.36
L-17	LS1	8.75349	94.62	89.57
L-18	LS1	8.71149	94.67	89.37
L-19	LS1	12.1551	95.03	92.77
L-20	LS1	9.01577	94.75	90
L-21B	LS1	8.45048	94.62	88.86
L-22B	LS1	9.411	94.76	90.56
